# Supplementary material
Source: PubMed Central journal article supplement (PMC4394994)

# Supplementary Figure 1

**A**

## Gene targeting of PQBP1

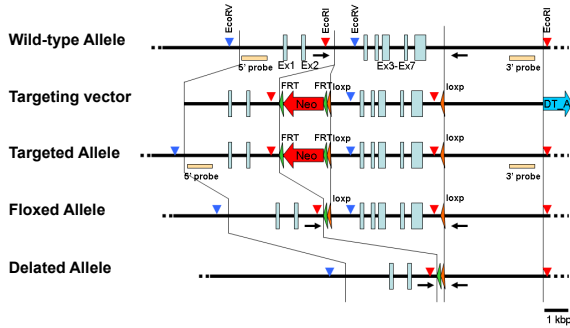

**B**

## Expression check of PQBP1 by Western blot and IHC

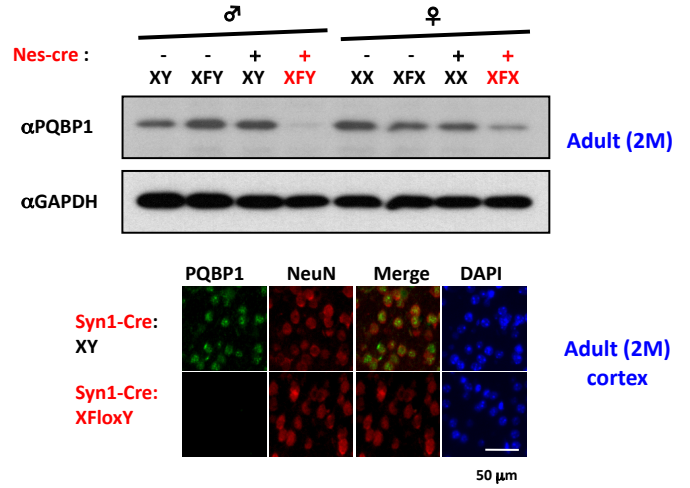

**C**

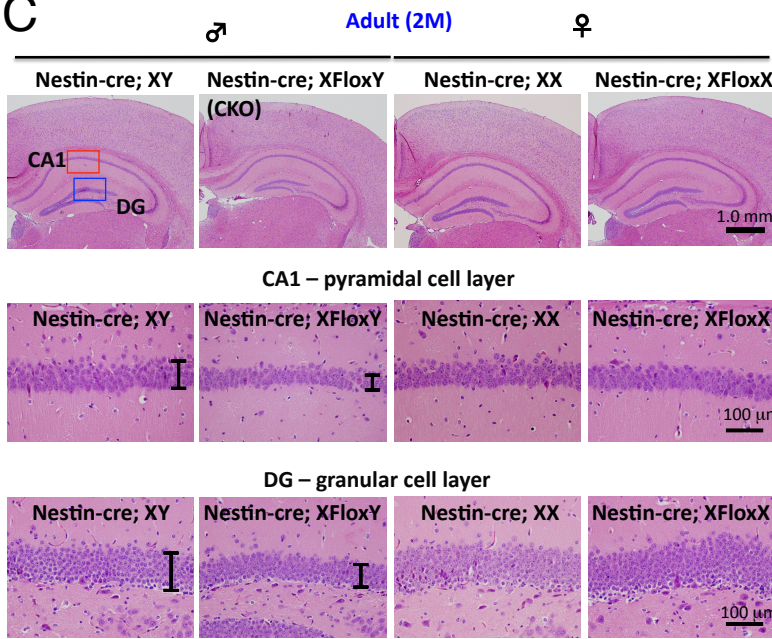

**D**

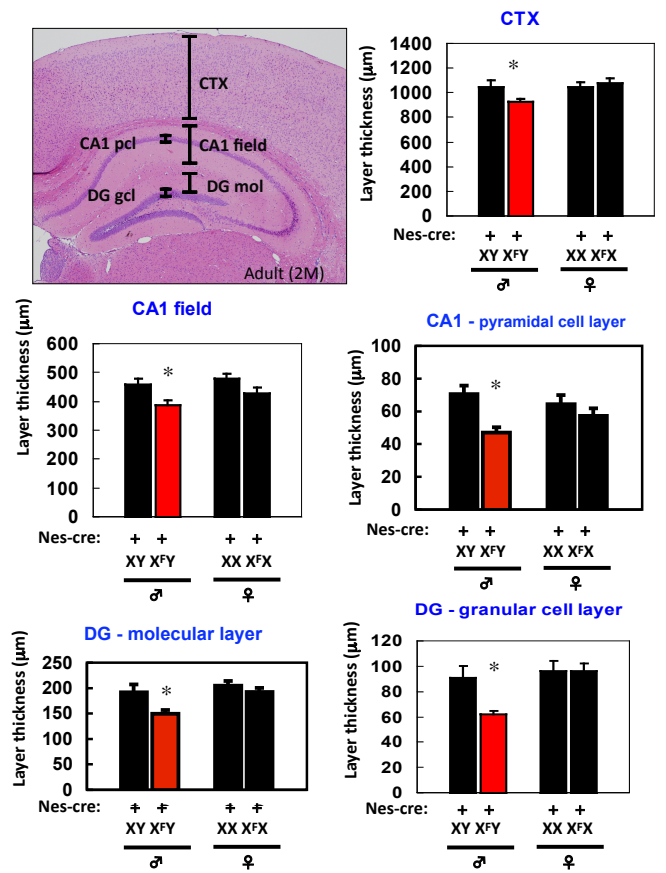

# Supplementary Figure 2

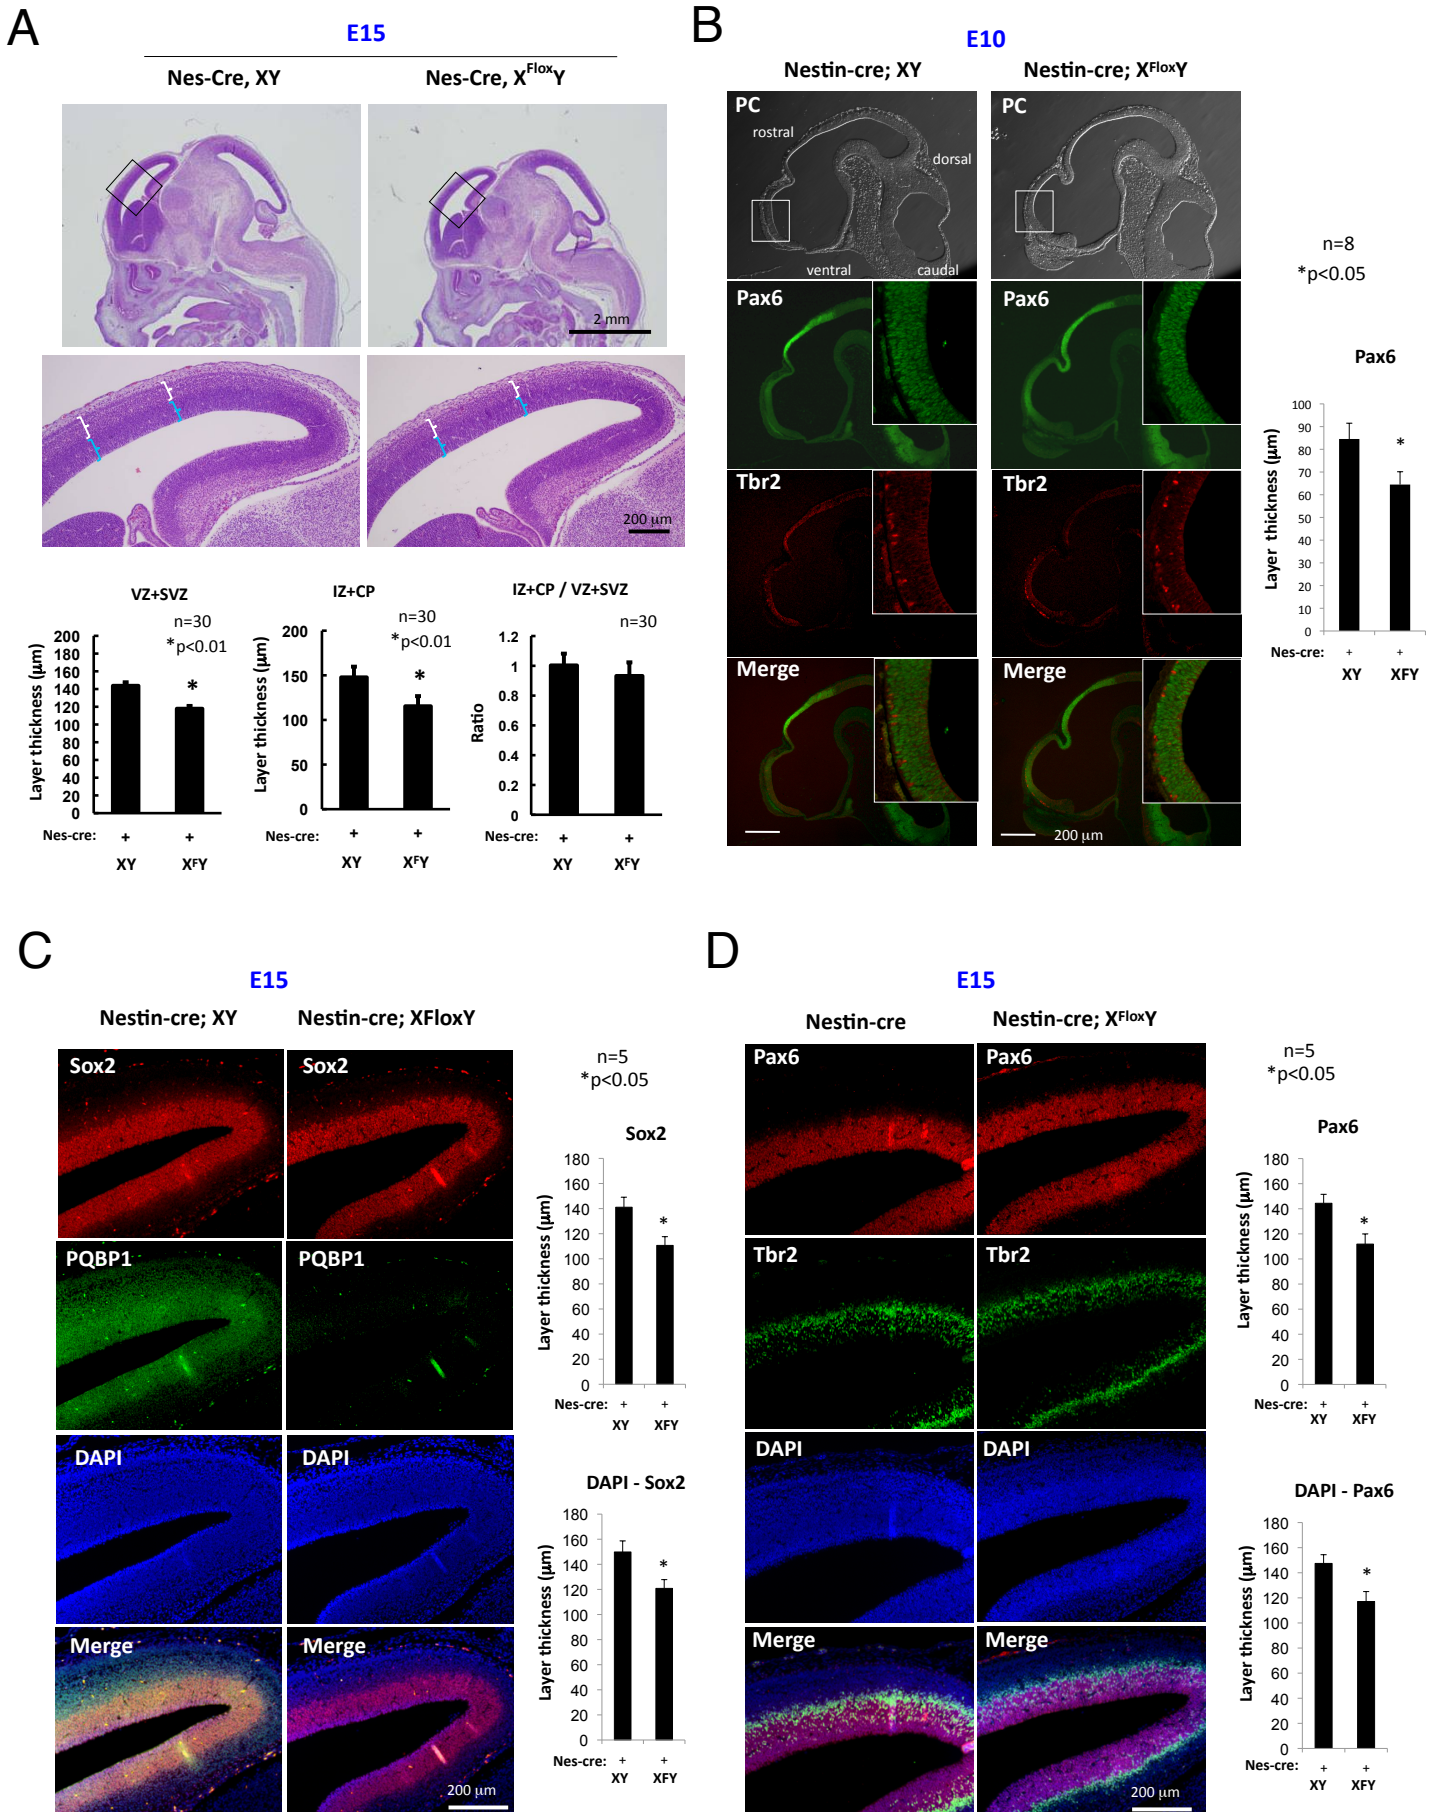



# Supplementary Figure 4

**A**

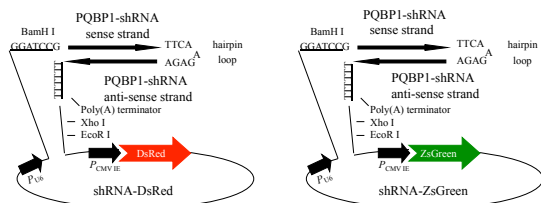

**B**

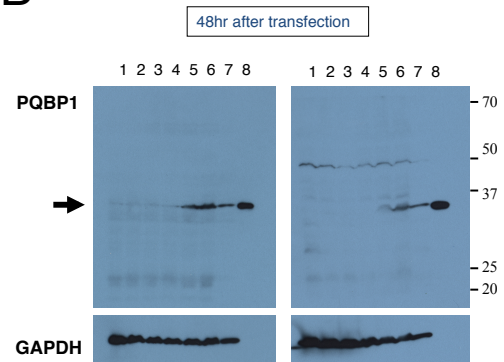

**C**

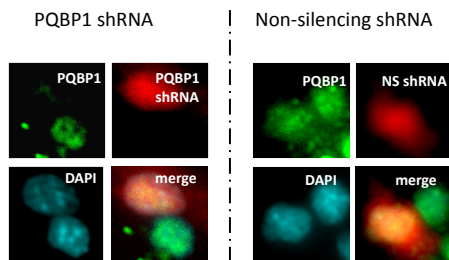

**D**

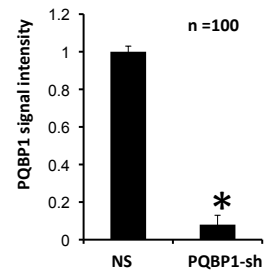

**E**

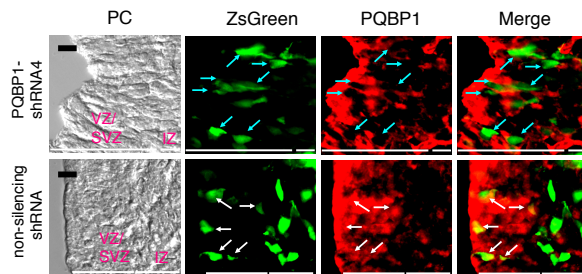

# Supplementary Figure 5

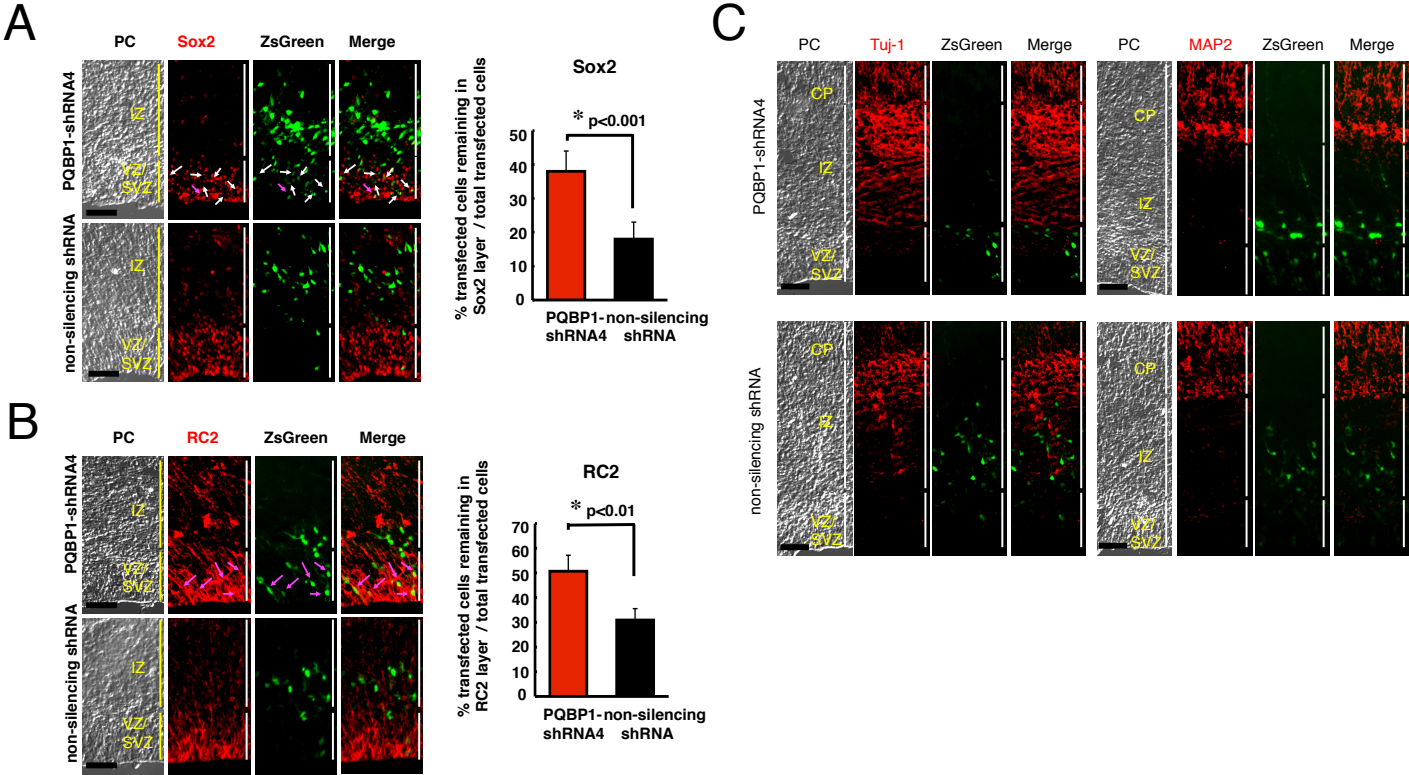

# Supplementary Figure 6

**A**

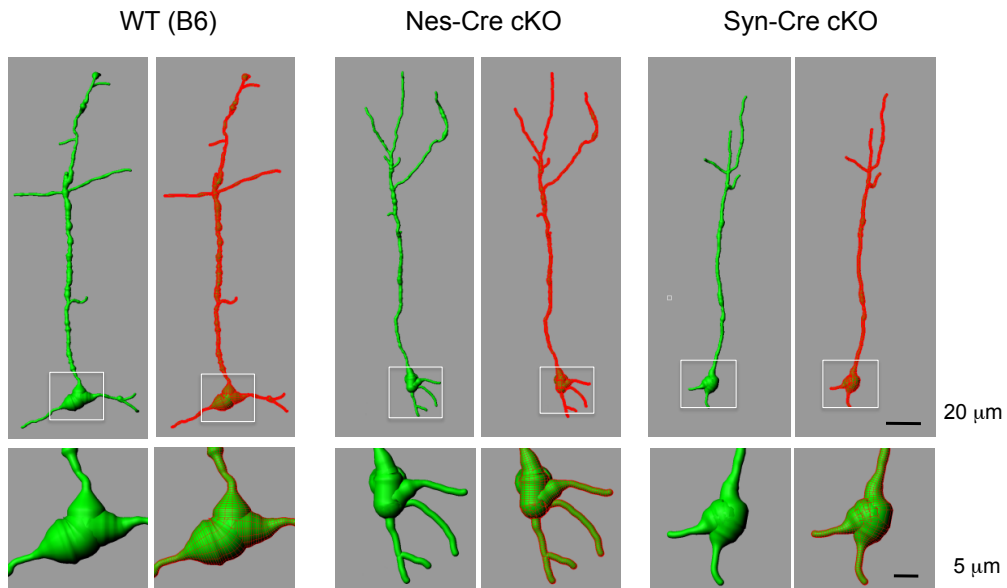

**B**

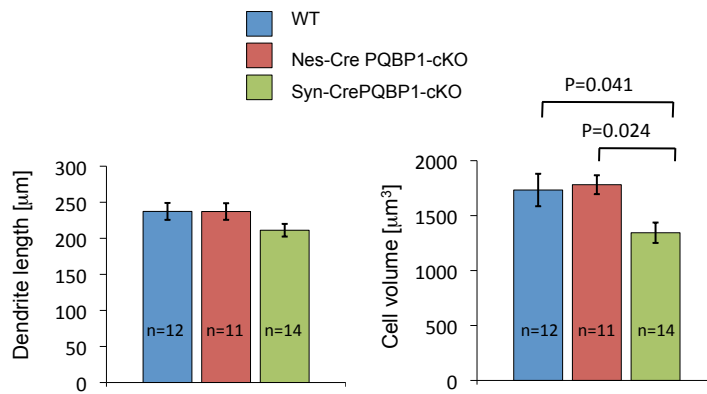

**C**

Cortical ventricular surface (whole mount, Red AC3, Green betaCatenin)  
Control (Nestin-cre) #2278

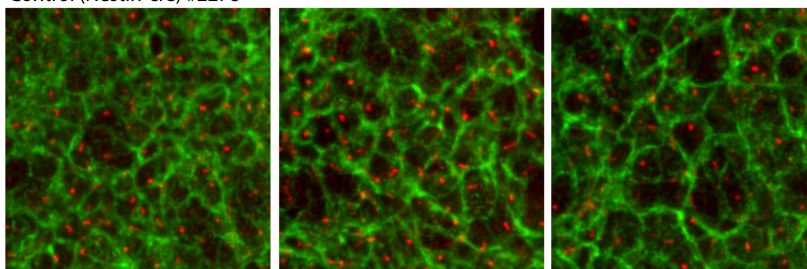

PQBP1 cko (PQBP1 flox/y, Nestin-cre) #2276

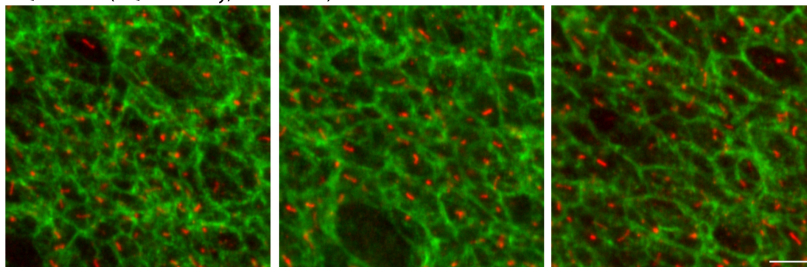

5  $\mu\text{m}$

# Supplementary Figure 7

A

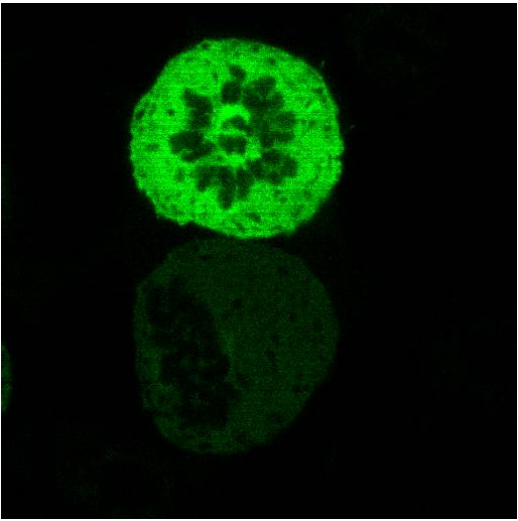

B

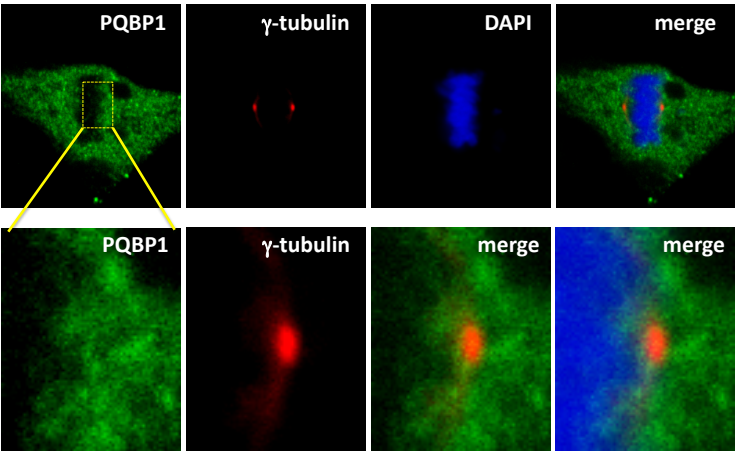

# Supplementary Figure 8

**A**

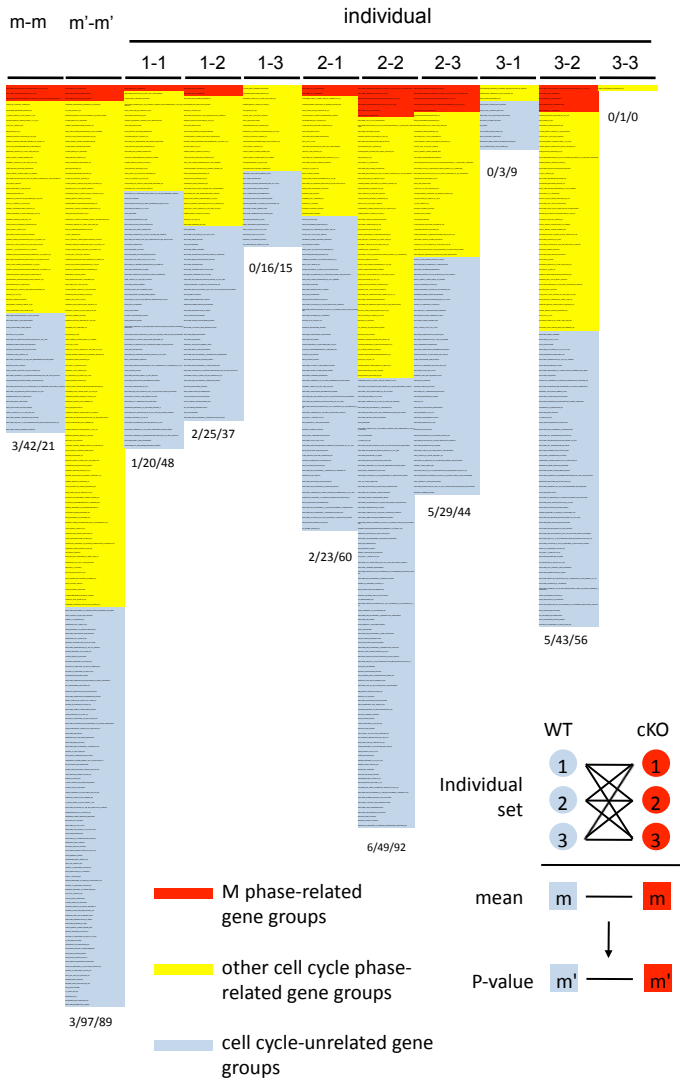

**C**

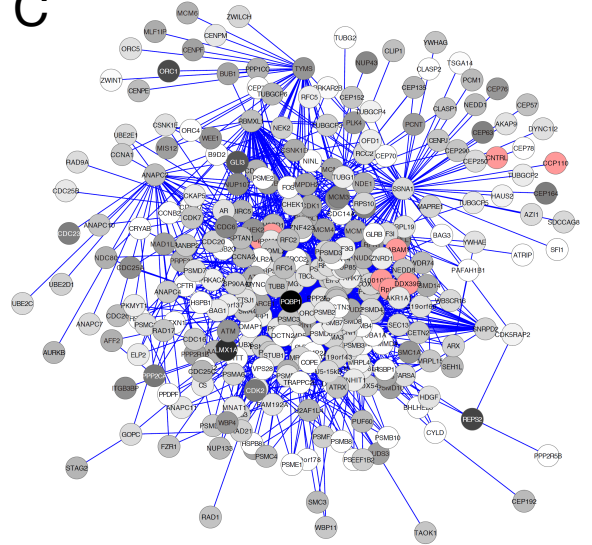

**D**

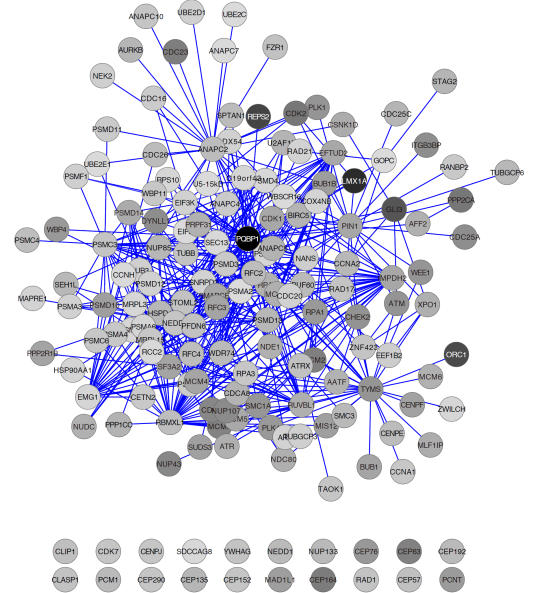

**B**

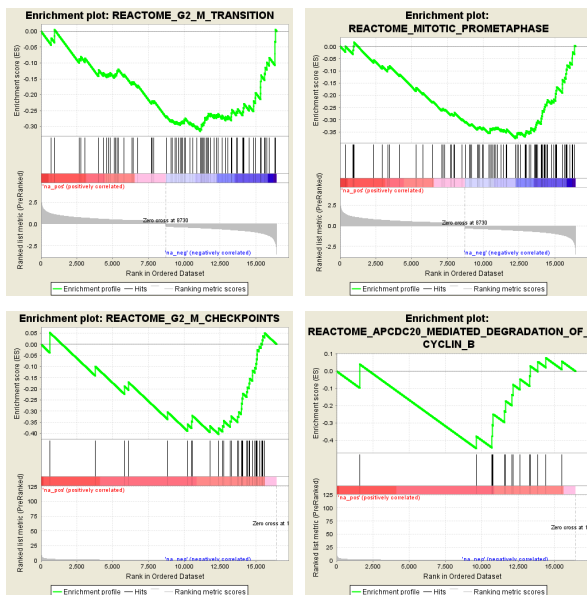

**E**

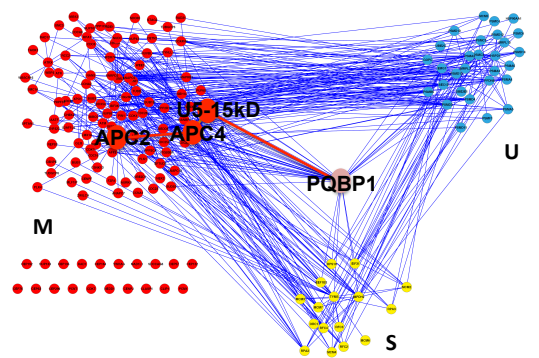



# Supplementary Figure 9

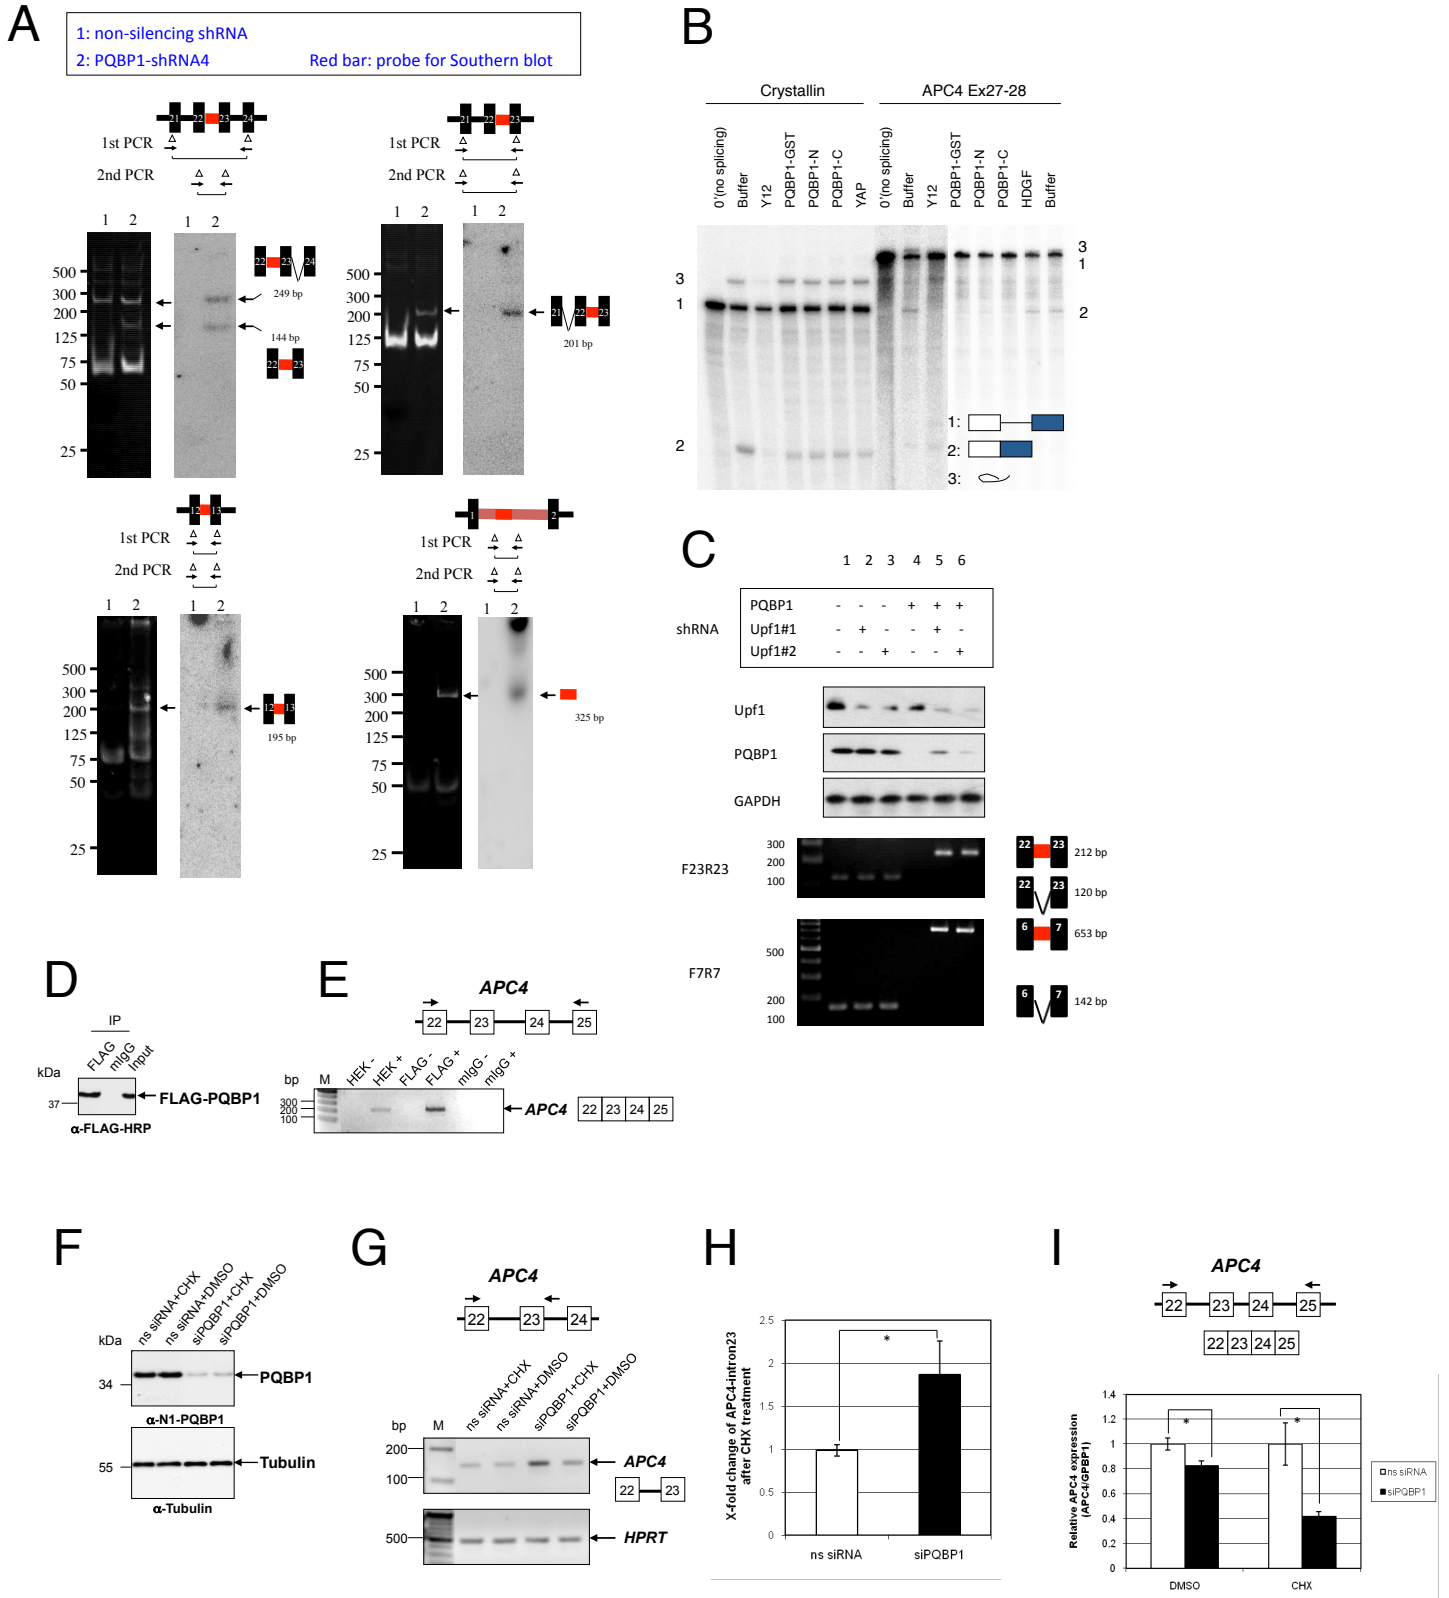

# Supplementary Figure 10

## Nes-cKO behavior test 3M

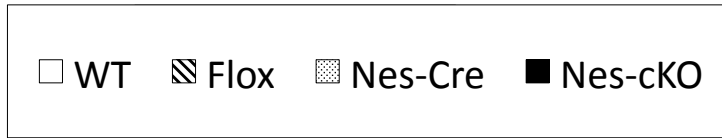

**A: Open Field**

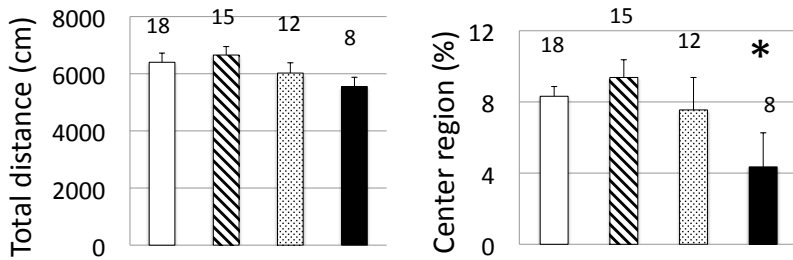

**B: Light-Dark Box**

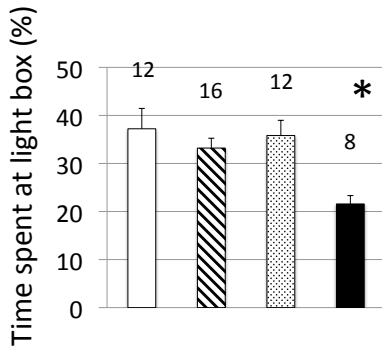

**C: Elevated plus maze**

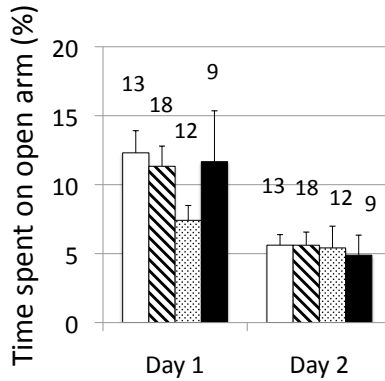

**D: Fear-conditioning**

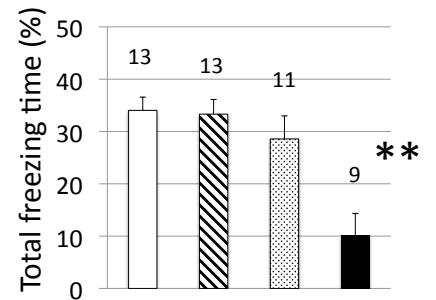

**E: Water maze**

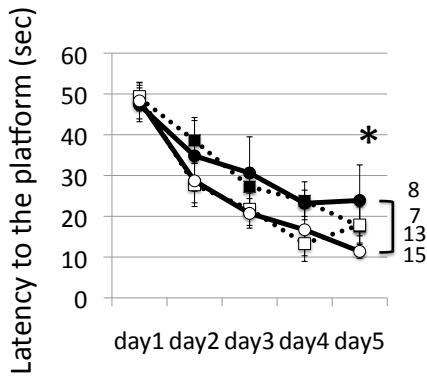

**F: Rotarod**

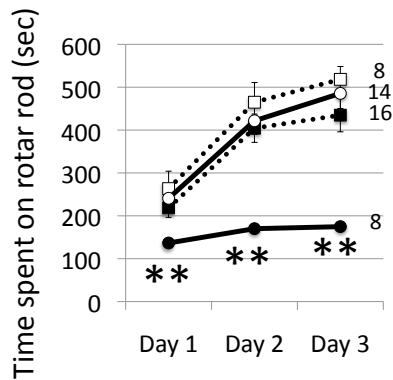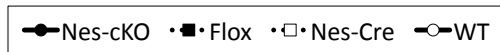

# Supplementary Figure 11

## Syn-cKO behavior test 3M

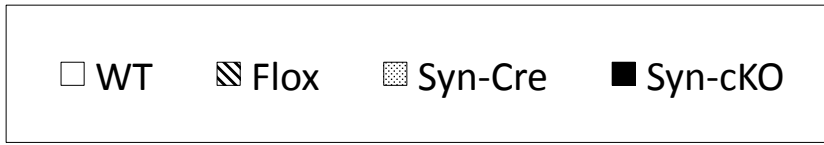

### A: Open Field

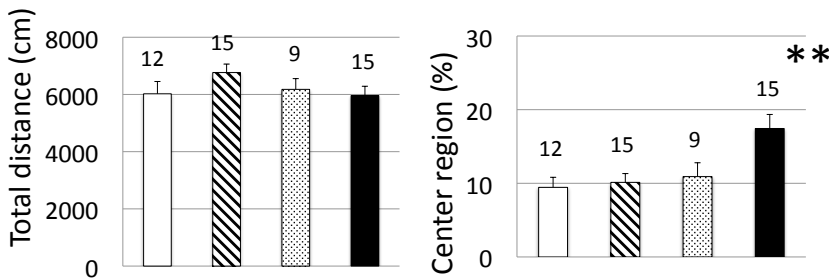

### B: Light-Dark Box

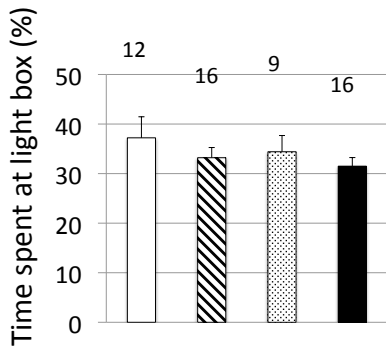

### C: Elevated plus maze

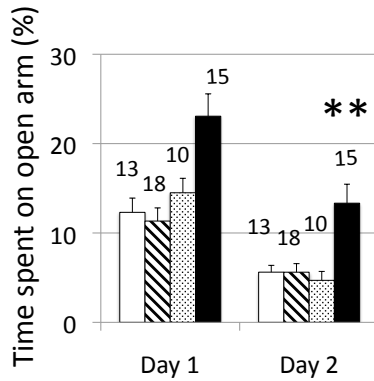

### D: Fear-conditioning

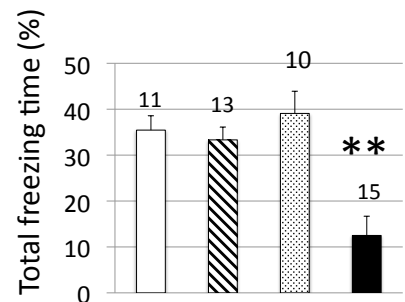

### E: Water maze

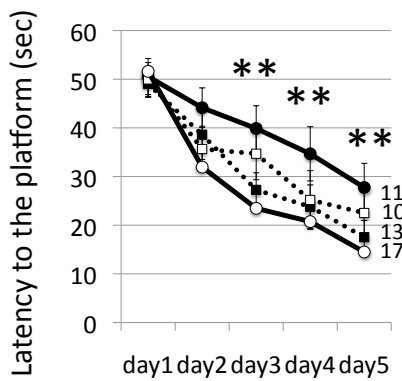

### F: Rotarod

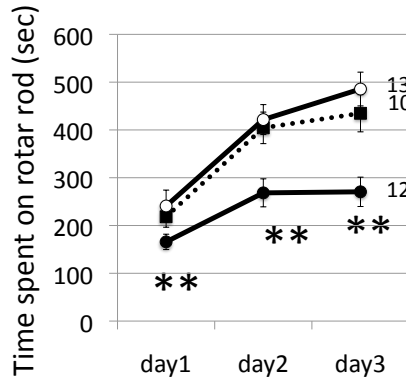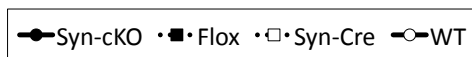

Supplement: NIHMS673955-supplement-Supplementary_Figures.pdf [file NIHMS673955-supplement-Supplementary_Figures.pdf]
